# Supplementary material for: Transfer of the Symbiotic Plasmid of Rhizobium etli CFN42 to Endophytic Bacteria Inside Nodules
Source: PubMed Central journal article supplement (PMC7403402; doi:10.3389/fmicb.2020.01752), 2020-07-29
Supplement: Image_1.pdf [file Image_1.pdf]

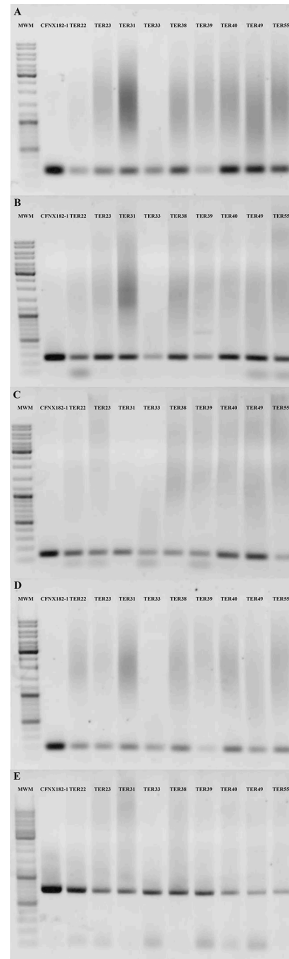

**FIGURE S1.** PCR amplifications of *R. etli* pSym markers in the TER strains.

To determine the presence of markers of the *R. etli* pSym in the putative transconjugants of endophytic recipients, DNA was isolated from the different strains and used as template to produce PCR products for *nodD1* (A), *nodA* (B), *fixNd* (C), *nifH* (D), and GFP (E), from the pSym of *R. etli* CFNX182-1. The lane labeled 182-1 corresponds to strain CFNX182-1, MWM – molecular weight markers.
